# Supplementary material for: Oxygen Saturation Target Achievement in Preterm Infants <32 Weeks’ Gestation with 9th Edition NRP Guidelines: A Multicenter Observational Study in Latin America
Source: Research Square preprint supplement (doi:10.21203/rs.3.rs-9487761/v1), 2026-05-21
Supplement: Supplementary file 1 [file 0608b18f634c9dbe06f9c3e6.docx]

**Table 1. Initial FiO2, achieved SpO2 and FiO2 at 5 minutes**

1. **Among all preterm infants < 32 weeks gestation.**

|  | **SpO2 at 5 minutes of age** | | | | | | | | **FiO2 at 5 min after birth** | | | | |
| --- | --- | --- | --- | --- | --- | --- | --- | --- | --- | --- | --- | --- | --- |
| **Initial FiO2 (n)** | **< 80%**  **n %** | | **80 -85%**  **n %** | | **86-95%**  **n %** | | **> 95%**  **n %** | | **0.21** | **0.3** | **0.4-0.5** | **0.6-0.9** | **1.0** |
| 0.21 (8) | 0 | - | 3 | 37% | 3 | 37% | 2 | 25% | 6 (75%) | 2  (25%) | - | - | - |
| 0.3 (123) | 13 | 10% | 17 | 14% | 70 | 57% | 23 | 19% | 20  (16%) | 41  (33%) | 29  (24%) | 20  (16%) | 13  (11%) |
| 0.4-0.5 (27) | 10 | 37% | 7 | 26% | 6 | 22% | 4 | 15% | - | - | 14  (52%) | 9  (33%) | 4  (15%) |
| 0.6-0.9 (12) | 3 | 25% | 4 | 33% | 4 | 33% | 1 | 8% |  |  | 1  (8%) | 7  (58%) | 4  (34%) |
| 1.0 (3) | 1 | 33% | 1 | 33% | 1 | 33% | 0 | - | - | - | - | - | 3  (100%) |
| **Total (173)** | **27** | **16%** | **32** | **18%** | **84** | **49%** | **30** | **17%** | **26**  **(15%)** | **43**  **(25%)** | **44**  **(25%)** | **36**  **(21%)** | **24**  **(14%)** |

**B. Among 41 preterm infants ≤26 weeks gestation.**

|  | **SpO2 at 5 minutes of age** | | | | | | | | **FiO2 at 5 min after birth** | | | | |
| --- | --- | --- | --- | --- | --- | --- | --- | --- | --- | --- | --- | --- | --- |
| **Initial FiO2 (n)** | **< 80%**  **n %** | | **80 -85%**  **n %** | | **86-95%**  **n %** | | **> 95%**  **n %** | | **0.21** | **0.3** | **0.4-0.5** | **0.6-0.9** | **1.0** |
| 0.21 (-) | - | - | - | - | - | - | - | - | - | - | - | - | - |
| 0.3 (29) | 7 | 24% | 3 | 10% | 15 | 52% | 4 | 14% | 3  (10%) | 2  (7%) | 9  (31%) | 6  (21%) | 9  (31%) |
| 0.4-0.5 (5) | 3 | 60% | - |  | 2 |  | - |  | - | - | 2  (40%) | 1  (20%) | 2  (40%) |
| 0.6-0.9 (6) | 1 | 17% | 1 | 17% | 4 |  | - |  | - | - | - | 4  (67%) | 2  (33%) |
| 1.0 (1) | 1 | 100% | - |  | - |  | - |  | - | - | - | - | 1  (100%) |
| **Total (41)** | **12** | **29%** | **4** | **10%** | **21** | **51%** | **4** | **10%** | **3**  **(7%)** | **2**  **(5%)** | **11**  **(27%)** | **11**  **(27%)** | **14**  **(34%)** |
